# Supplementary material for: De Novo Synthesis of Phosphatidylcholine Is Essential for the Promastigote But Not Amastigote Stage in Leishmania major
Source: PubMed Central journal article supplement (PMC7996062; doi:10.3389/fcimb.2021.647870), 2021-03-12
Supplement: DataSheet_1.pdf [file DataSheet_1.pdf]

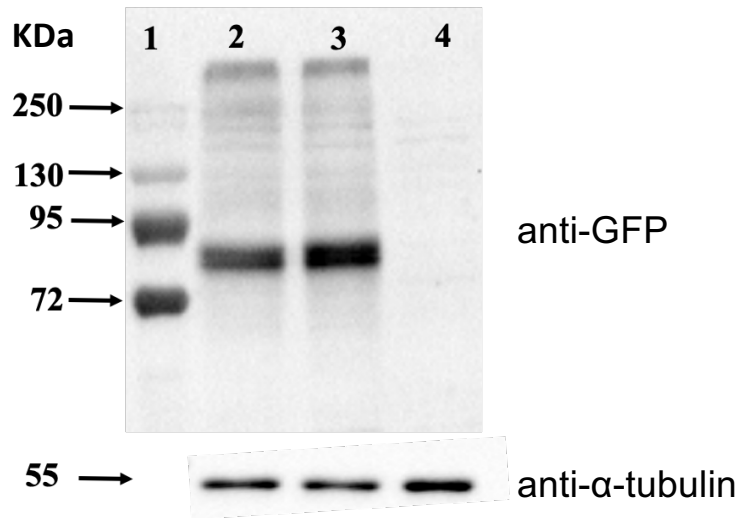

**Figure S1.** Validation of GFP-tagged CEPT expression by Western blot. Cell lysates from log phase *CEPT*<sup>+/-</sup>+pXG-*GFP-CEPT* clone 1 and 2 (Lane 2 and 3 respectively) and LV39WT promastigotes (lane 4) were analyzed by Western blot using antibodies against GFP (top) or  $\alpha$ -tubulin (bottom). Lane 1: molecular weight marker.
