# Supplementary material for: De Novo Synthesis of Phosphatidylcholine Is Essential for the Promastigote But Not Amastigote Stage in Leishmania major
Source: PubMed Central journal article supplement (PMC7996062; doi:10.3389/fcimb.2021.647870), 2021-03-12
Supplement: DataSheet_3.pdf [file DataSheet_3.pdf]

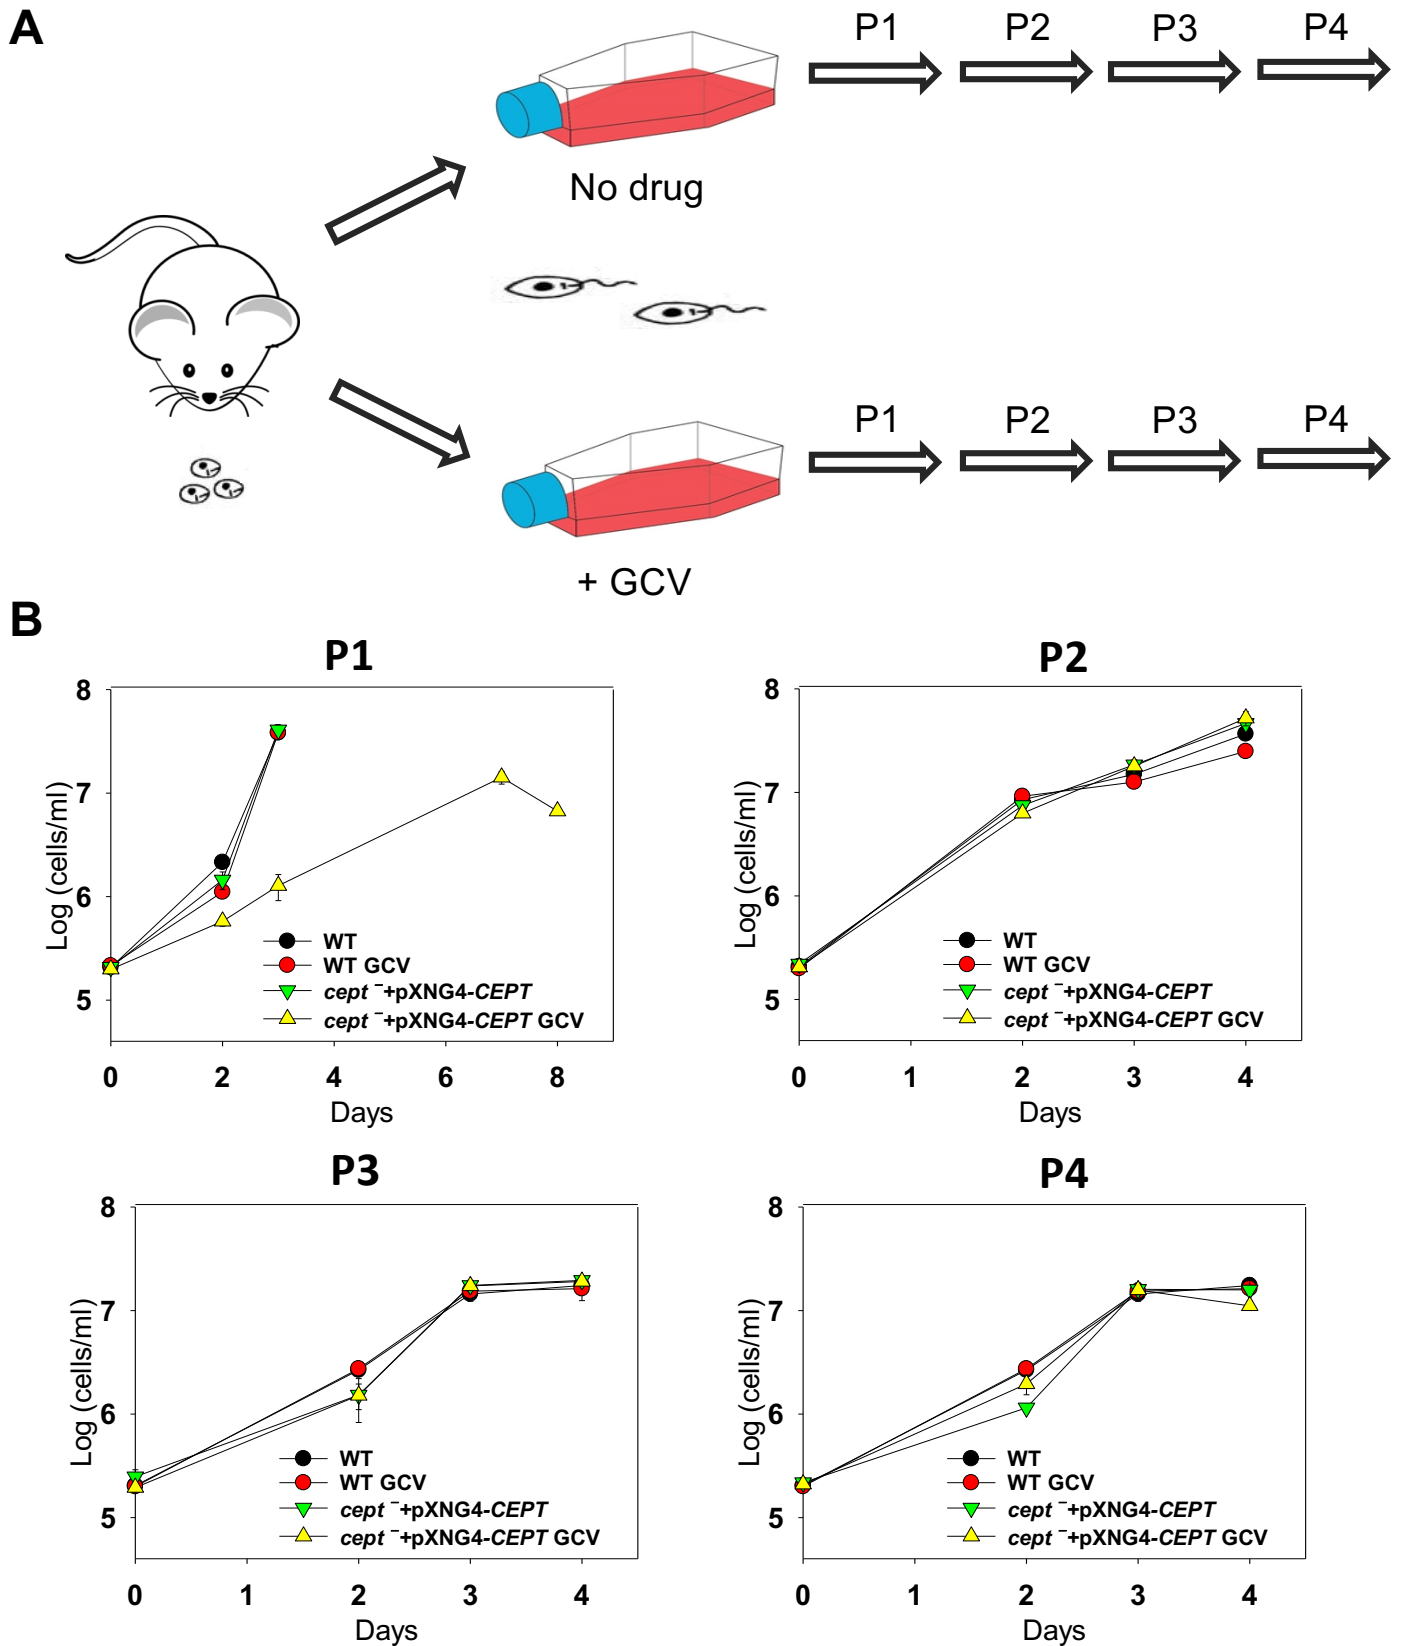

**Figure S3. GCV treatment delayed the growth of *cept*<sup>-</sup>+pXNG4-*CEPT* promastigotes in the initial passage after recovery from mice. (A)** Experimental scheme. Amastigotes were isolated from mice and allowed to recover in complete M199 media in the absence or presence 50  $\mu$ g/ml of GCV. **(B)** In subsequent passages (P1-P4), promastigotes were inoculated at  $2.0 \times 10^5$  cells/ml in the absence or presence 50  $\mu$ g/ml of GCV. For each passage, culture densities were determined daily.
