# Supplementary material for: De Novo Synthesis of Phosphatidylcholine Is Essential for the Promastigote But Not Amastigote Stage in Leishmania major
Source: PubMed Central journal article supplement (PMC7996062; doi:10.3389/fcimb.2021.647870), 2021-03-12
Supplement: DataSheet_4.pdf [file DataSheet_4.pdf]

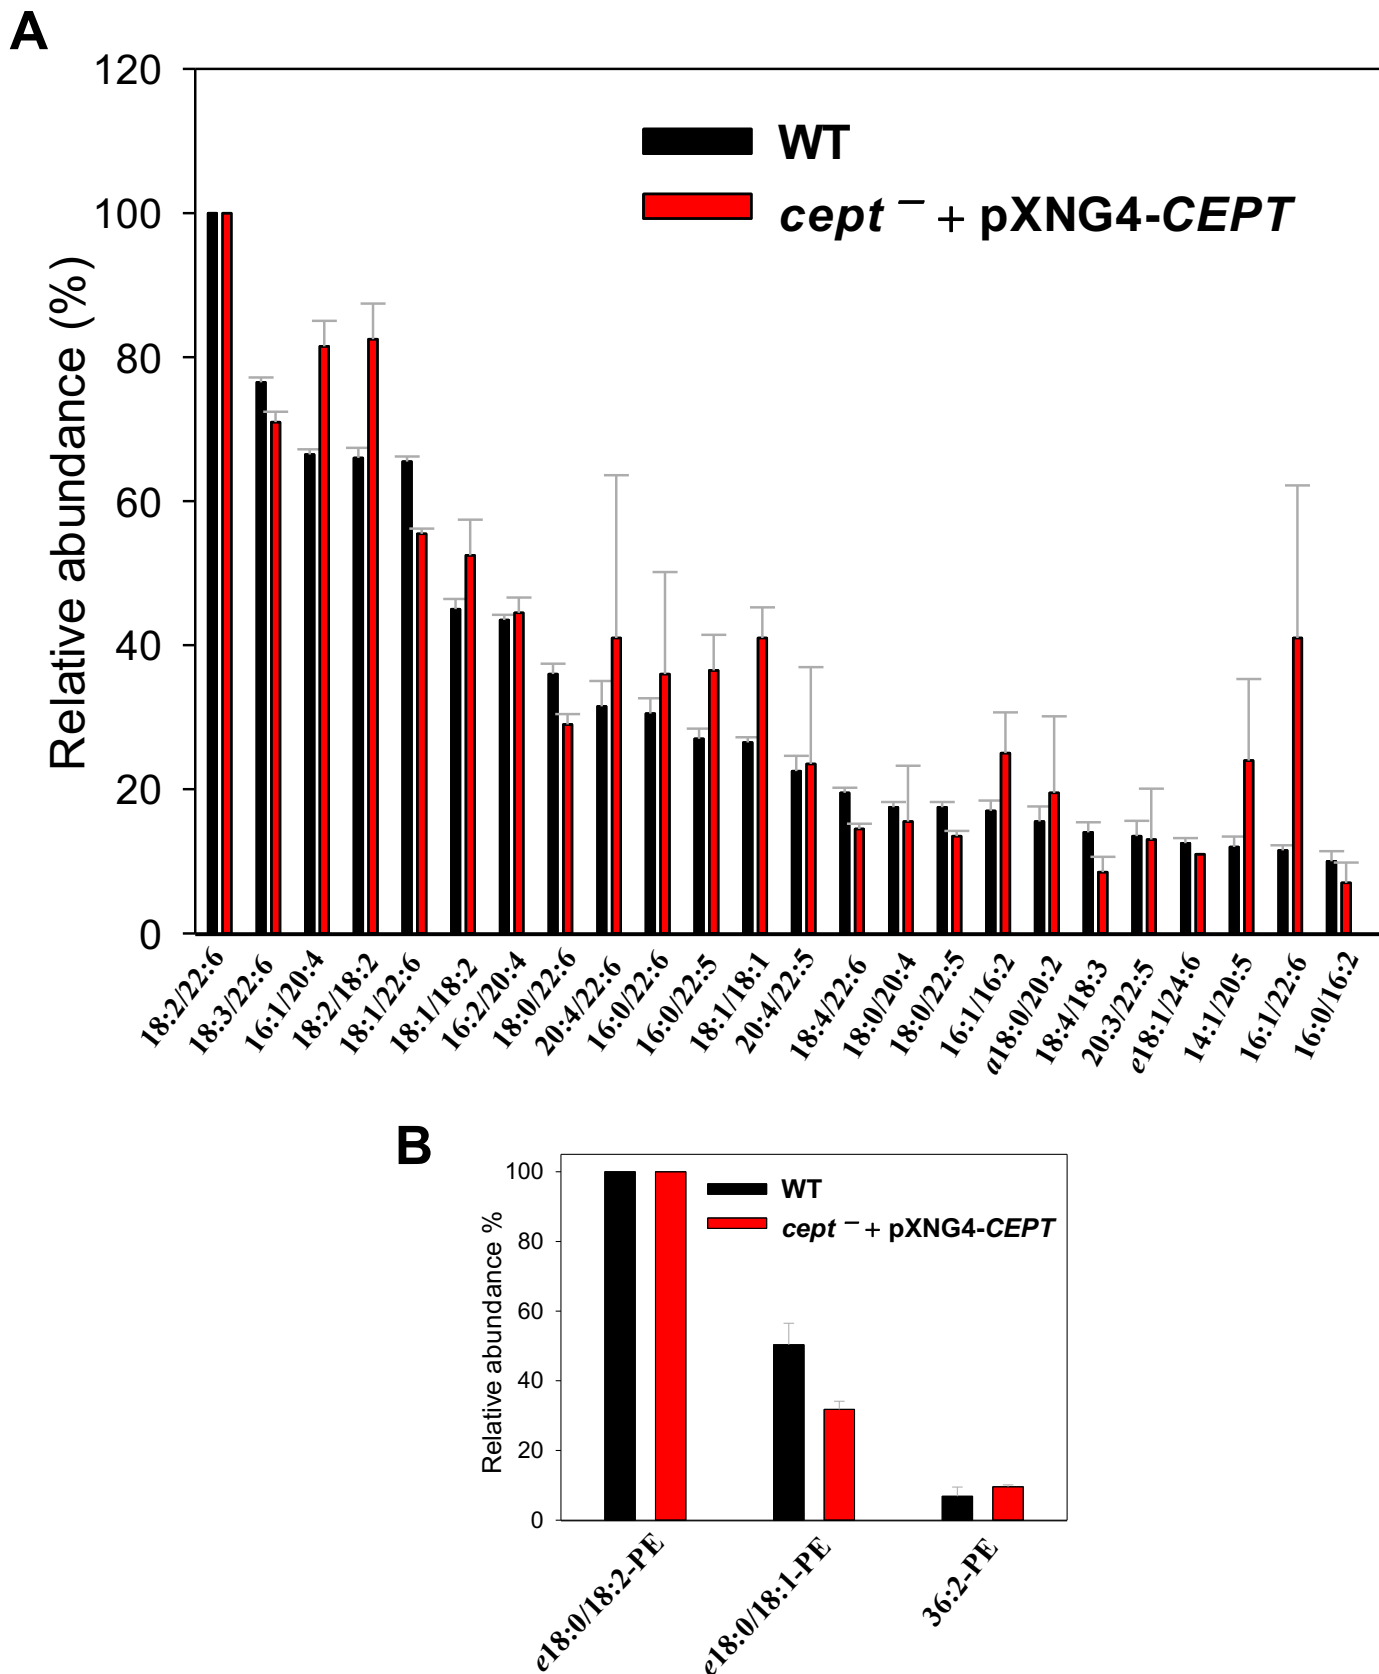

**Figure S4.** *Cept*<sup>-</sup>+pXNG4-CEPT promastigotes show similar phospholipid composition as WT promastigotes. Lipids from log phase promastigotes were analyzed by ESI-MS in the positive ion mode (A: for PC) and negative ion mode (B: for PE). Predicted fatty acyl constituents were indicated. Only major PC and PE species (>5% by relative abundance) are shown.
