# Supplementary material for: De Novo Synthesis of Phosphatidylcholine Is Essential for the Promastigote But Not Amastigote Stage in Leishmania major
Source: PubMed Central journal article supplement (PMC7996062; doi:10.3389/fcimb.2021.647870), 2021-03-12
Supplement: DataSheet_5.pdf [file DataSheet_5.pdf]

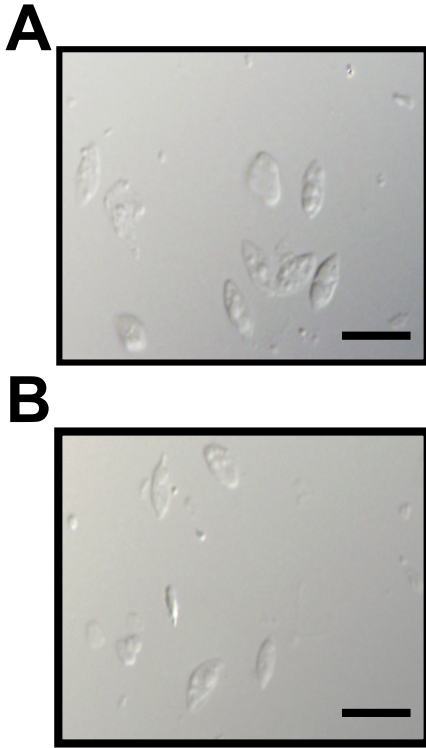

**Figure S5. DIC images of partially purified amastigotes.** Amastigotes of WT (A) and *cept*<sup>-</sup>+pXNG4-*CEPT* (B) were isolated from infected BALB/c mice and partially purified as described in Materials and Methods. Scale bars: 10  $\mu$ m.
