# Supplementary material for: De Novo Synthesis of Phosphatidylcholine Is Essential for the Promastigote But Not Amastigote Stage in Leishmania major
Source: PubMed Central journal article supplement (PMC7996062; doi:10.3389/fcimb.2021.647870), 2021-03-12
Supplement: DataSheet_6.pdf [file DataSheet_6.pdf]

**Table S1. List of oligonucleotides used in this study**

| <b>Primer #</b> | <b>Primer name</b>               | <b>Sequence</b>                              |
|-----------------|----------------------------------|----------------------------------------------|
| #129            | 5' <i>CEPT</i> ORF               | GATCAGGGATCCACCATGCCCCCGAAGTCGATGGC          |
| #130            | 3' <i>CEPT</i> ORF               | GATCATGGATCCCTAATCTGACTTATTCGGTT             |
| #137            | <i>CEPT</i> 5' UTR<br>Upstream   | GATCATGAATTCGACGGAACTCTTAGCCACTC             |
| #138            | <i>CEPT</i> 5' UTR<br>Downstream | GTCAGCGGATCCGATCTAACTAGTCTTCGTTCTCCTTGTTTTGG |
| #139            | <i>CEPT</i> 3' UTR<br>Upstream   | GATCATGGATCCAGCAGCTGCGAAGTCCGCCC             |
| #140            | <i>CEPT</i> 3' UTR<br>Downstream | GATCATAAGCTTTACACCACCTCCTCGTCAAG             |
| #784            | <i>CEPT</i> qRT forward          | GGAGAGTATCAACCCGCTCG                         |
| #785            | <i>CEPT</i> qRT reverse          | CAGTACCGCTGCAGGACATA                         |
| #780            | 28S rRNA gene<br>forward         | AAGATGGACCGGCCTCTAGT                         |
| #781            | 28S rRNA gene<br>reverse         | ATCCTTCCCCGCTCCAGTAT                         |
| #782            | pXNG4 forward                    | CCCGACAACCACTACCTGAG                         |
| #783            | pXNG4 reverse                    | GTCCATGCCGAGAGTGATCC                         |
