# Supplementary material for: De Novo Synthesis of Phosphatidylcholine Is Essential for the Promastigote But Not Amastigote Stage in Leishmania major
Source: PubMed Central journal article supplement (PMC7996062; doi:10.3389/fcimb.2021.647870), 2021-03-12
Supplement: DataSheet_7.pdf [file DataSheet_7.pdf]

**Table S2. Quantitative analysis of colocalization between GFP-CEPT and the ER marker BiP**

| <b>GFP-CEPT Image #</b> | <b># of Cells analyzed</b> | <b>Pearson's Coefficient</b> |
|-------------------------|----------------------------|------------------------------|
| 1                       | 4                          | 0.809                        |
| 2                       | 7                          | 0.754                        |
| 3                       | 5                          | 0.755                        |
| 4                       | 3                          | 0.68                         |
| 5                       | 9                          | 0.742                        |
| 6                       | 3                          | 0.713                        |
| 7                       | 6                          | 0.756                        |
| 8                       | 23                         | 0.796                        |
| 9                       | 15                         | 0.734                        |
| 10                      | 8                          | 0.698                        |
| 11                      | 14                         | 0.773                        |
| 12                      | 10                         | 0.737                        |
| 13                      | 9                          | 0.783                        |
| 14                      | 9                          | 0.761                        |
| 15                      | 6                          | 0.736                        |
| 16                      | 5                          | 0.519                        |

Total cells analyzed: 136. Average Pearson's Coefficient  $\pm$  SD:  $0.734 \pm 0.04$
